# Supplementary material for: Clinical and Laboratory Characteristics of Pediatric COVID-19 Population—A Bibliometric Analysis
Source: MDPI journal article supplement (doi:10.3390/jcm11205987), 2022-10-11
Supplement: s1 [file s1]

## Supplementary Materials

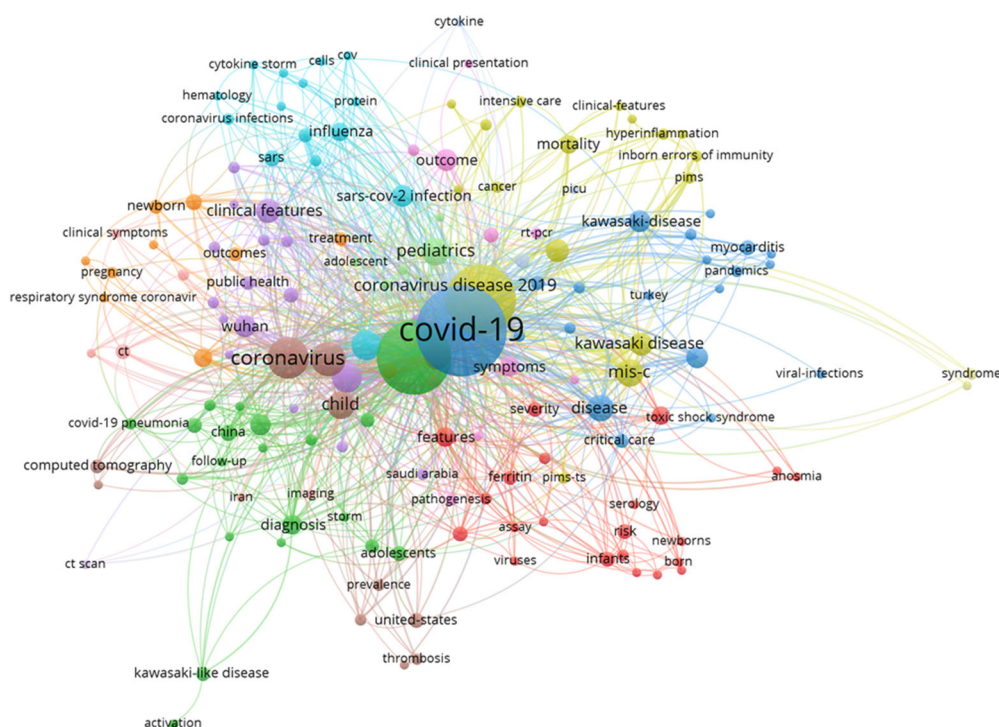

**Figure S1.** VOSviewer network visualization map of keywords (author keywords and keywords plus). From the total number of 645 keywords, 160 were encountered minimum 2 times.

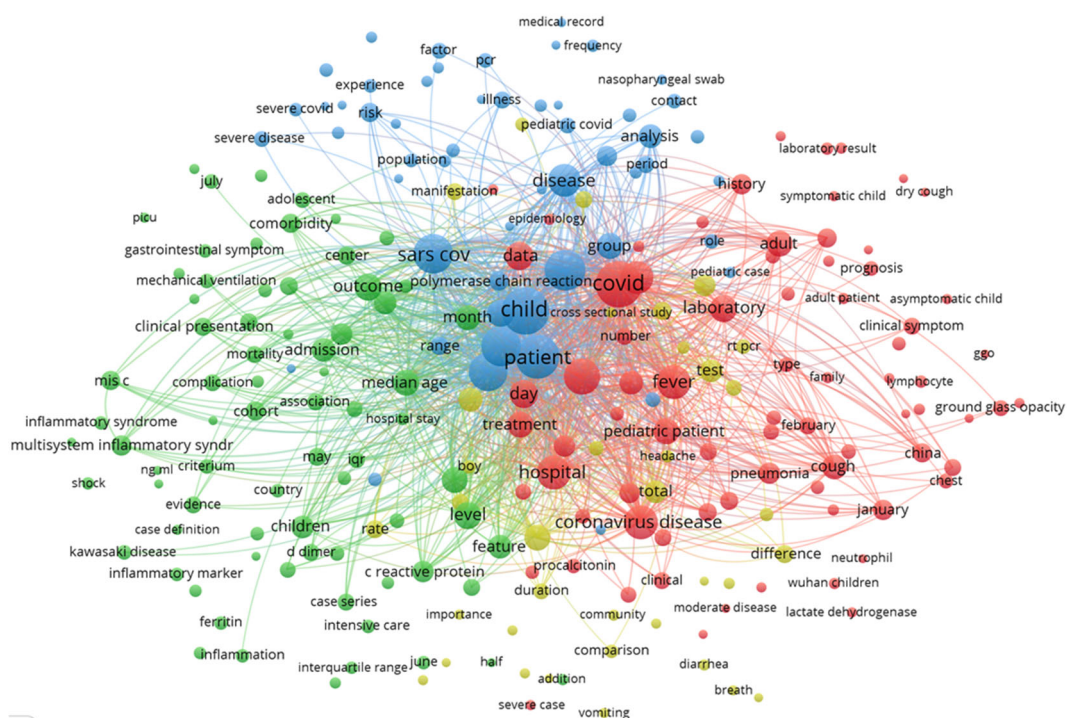

**Figure S2.** VOSviewer network visualization map of terms from title and abstract. From the total number of 6466 terms, 242 were encountered minimum 10 times.
